# Supplementary material
Source: HighWire-hosted journal article supplement (https://bmjopen.bmj.com/content/10/8/e037554)

## Appendix

To: **HEALTH IMPACTS AND ENVIRONMENTAL FOOTPRINTS OF DIETS THAT MEET  
THE EATWELL GUIDE RECOMMENDATIONS: ANALYSES OF MULTIPLE UK STUDIES**

## **Appendix 1 - Basic study descriptions for each cohort**

### **Million Women Study**

We used data from 464,078 participants of the Million Women Study. Participants were recruited from women (mean age 56 years) invited to the National Health service (NHS) breast cancer screening programme in England and Scotland between 1996 and 2001 [1]. Dietary intake was collected after an average of 3.3 years post recruitment using 130 semi-quantitative questions that were validated against a 7-day diet diary [2]. Nutrients were estimated by multiplying the frequency of consumption by portion size and nutrient composition of that item [3].

Total mortality was determined using death records obtained through linkage to centrally held NHS records. The Million Women Study protocol was approved by the Oxford and Anglia Multi-Centre Research Ethics committee. All participants provided written informed consent.

### **EPIC Oxford**

We used data from 40,030 men and women (mean age 43 years) recruited throughout the UK (between 1993-2001) into the European Prospective Investigation into Cancer and Nutrition (EPIC)-Oxford cohort [4]. Dietary intake was collected using a validated 130-item semi-quantitative Food frequency questionnaire [5]. To estimate nutrient intakes, we multiplied frequencies of consumption by portion size and nutrient composition.

Total mortality was ascertained using death record linkage with the NHS Central register.

The EPIC-Oxford study protocol was approved by a Multi-Centre Research Ethics Committee (Scotland A Research Ethics Committee). All participants provided written informed consent.

### **UK Biobank**

We used data from 53,614 middle-aged adults (mean age 56 years) participating in the UK Biobank who were recruited across the UK between 2006-2010 [6]. These were a subsample, that had completed a minimum of three 24-hour dietary recall questionnaires (the Oxford WebQ) [7]. Food and beverage frequency data, standard portion sizes and nutrient composition by item were multiplied to obtain nutrient intakes per day [8].

We linked participant data to the NHS Central register to obtain mortality information.

The UK Biobank was approved by the National Information Governance Board for Health and Social Care and the NHS North West Multi-Centre Research Ethics Committee. All participants provided written informed consent.

## References

1. Green, J., et al., *Cohort profile: the million women study*. International journal of epidemiology, 2018. **48**(1): p. 28-29e.
2. Roddam, A.W., et al., *Reproducibility of a short semi-quantitative food group questionnaire and its performance in estimating nutrient intake compared with a 7-day diet diary in the Million Women Study*. Public Health Nutr, 2005. **8**(2): p. 201-13.
3. Key, T.J., et al., *Foods, macronutrients and breast cancer risk in postmenopausal women: a large UK cohort*. Int J Epidemiol, 2018: p. dyy238-dyy238.
4. Davey, G.K., et al., *EPIC-Oxford: lifestyle characteristics and nutrient intakes in a cohort of 33 883 meat-eaters and 31 546 non meat-eaters in the UK*. Public Health Nutrition, 2007. **6**(3): p. 259-268.
5. Bingham, S.A., et al., *Validation of dietary assessment methods in the UK arm of EPIC using weighed records, and 24-hour urinary nitrogen and potassium and serum vitamin C and carotenoids as biomarkers*. Int J Epidemiol, 1997. **26 Suppl 1**: p. S137-51.
6. Collins, R., *What makes UK Biobank special?* Lancet, 2012. **379**(9822): p. 1173-1174.
7. Greenwood, D.C., et al., *Validation of the Oxford WebQ online 24-hour dietary questionnaire using biomarkers*. Am J Epidemiol, 2019.
8. Bradbury, K.E., et al., *Dietary assessment in UK Biobank: an evaluation of the performance of the touchscreen dietary questionnaire*. J Nutr Sci, 2018. **7**: p. e6.

**Appendix 2 – Eatwell Guide recommendations by age and sex**

|                                | 5-6 years |        | 7-10 years |        | 11-14 years |        | 15-18 years |        | 19-64 years |        | 65-74 years |        | 75+ years |        |
|--------------------------------|-----------|--------|------------|--------|-------------|--------|-------------|--------|-------------|--------|-------------|--------|-----------|--------|
| Food group                     | Male      | Female | Male       | Female | Male        | Female | Male        | Female | Male        | Female | Male        | Female | Male      | Female |
| Fruit & Vegetables (g/day)     | 400*      | 400g*  | 400g*      | 400g*  | 400g*       | 400g*  | 400g*       | 400g*  | 400g*       | 400g*  | 400g*       | 400g*  | 400g*     | 400g*  |
| Oily Fish (g/day)              | 20g       | 20g    | 20g        | 20g    | 20g         | 20g    | 20g         | 20g    | 20g         | 20g    | 20g         | 20g    | 20g       | 20g    |
| Other Fish (g/day)             | 20g       | 20g    | 20g        | 20g    | 20g         | 20g    | 20g         | 20g    | 20g         | 20g    | 20g         | 20g    | 20g       | 20g    |
| Red and processed meat (g/day) | 70        | 70     | 70         | 70     | 70          | 70     | 70          | 70     | 70          | 70     | 70          | 70     | 70        | 70     |
| Fibre (g/day)                  | 20**      | 20**   | 20**       | 20**   | 25**        | 25**   | 30**        | 30**   | 30**        | 30**   | 30**        | 30**   | 30**      | 30**   |
| Salt (g/day)                   | 3**       | 3**    | 5**        | 5**    | 6           | 6      | 6           | 6      | 6           | 6      | 6           | 6      | 6         | 6      |
| Free Sugar (g/day)             | 19        | 19     | 24         | 24     | 30          | 30     | 30          | 30     | 30          | 30     | 30          | 30     | 30        | 30     |
| Saturated fat (g/day)          | 18**      | 17 **  | 22**       | 20     | 30          | 20     | 30          | 20     | 30          | 20     | 30          | 20     | 30        | 20     |
| Total fat (g/day)              | 58**      | 54**   | 71**       | 66**   | 97**        | 78**   | 97**        | 78**   | 97**        | 78**   | 91**        | 74**   | 89**      | 72**   |

\*30g of dried fruit, max 150ml fruit juice or smoothie, and max 80g beans considered as one portion

\*\*Figures from PHE Government Dietary Recommendations document, derived from SACN. All other figures from the UK Eatwell Guide.

**Dietary recommendations of the Eatwell Guide****Dietary recommendation and constraints****Nutrients**

|               |                          |
|---------------|--------------------------|
| Energy        | 2250 kcal (9414 MJ)*     |
| Carbohydrates | ≥50% of food energy      |
| Free sugars   | ≤5% food energy          |
| Fat           | ≤35% food energy         |
| Saturated fat | ≤11% food energy         |
| Protein       | ≥14.5 & ≤15.5% of energy |
| Salt          | ≤ 6g/2363 mg/d sodium    |
| Fibre (AOAC)  | ≥30g/d                   |

**Foods**

---

|                        |                                                           |
|------------------------|-----------------------------------------------------------|
| Fruits and vegetables† | ≥5 portions a day                                         |
| Fish                   | ≥ 2 portions (2*140g) a week, one of which should be oily |
| Red and processed meat | ≤70g/day                                                  |

Table adapted from Public Health England (2016), Table 2.

\*Energy intake recommendation assumes mixed population average.

†Fruit and vegetable intake includes a maximum of: 1 portion of juice (from fruit / vegetable juice or that in a smoothie); 1 portion of beans; (portion sizes: 30g dried fruit; combined total of 150ml of fruit and / or vegetable juice and / or smoothie; 80g all other fruits & vegetables).

### Appendix 3 – Cohort specific adjustments and cut-off values

#### Million Women Study

Associations were stratified by region and adjusted for smoking (never smoked, past smoker, current smoker <10 cigarettes smoked per day, current smoker 10-19 cigarettes smoked per day, current smoker  $\geq 20$  cigarettes smoked per day, current smoker and unknown number of cigarettes smoked per day), deprivation (tertiles), alcohol (0, 1-6, 7-14,  $\geq 15$  drinks per week), height cm (<155, 155-164,  $\geq 165$ ), BMI kg/m<sup>2</sup> (<20, 20-24, 25-29,  $\geq 30$ ), strenuous exercise (<1 per week,  $\geq 1$  per week), Hormone replacement therapy (HRT) use (never, past, current), educational attainment (none, technical/secondary/tertiary), self-reported hypertension (yes, no), and energy intake (quintiles).

#### EPIC Oxford

Associations were stratified by sex, region, and method of recruitment and adjusted for smoking (never smoked, past smoker, current smoker <10 cigarettes smoked per day, current smoker 10-19 cigarettes smoked per day, current smoker  $\geq 20$  cigarettes smoked per day, current smoker and unknown number of cigarettes smoked per day), deprivation (tertiles, unknown), alcohol intake (<1, 1-7 (ref.), 8-15,  $\geq 16$  grams per day, unknown), height cm (sex-specific tertiles, unknown), BMI kg/m<sup>2</sup> (<20, 20-24, 25-29,  $\geq 30$ ), physical activity (inactive, low, moderate, high activity, unknown), HRT use ever (yes, no, unknown), educational attainment (national examination at age 16, national examination at ages 17-18, vocational qualification, degree, unknown), self-reported high blood pressure (no, yes, unknown), and energy intake (sex-specific quintiles)

#### UK Biobank

Associations were stratified by sex and region and adjusted for smoking (never smoked, past smoker, current smoker <10 cigarettes smoked per day, current smoker 10-19 cigarettes smoked per day, current smoker  $\geq 20$  cigarettes smoked per day, current smoker and unknown number of cigarettes smoked per day), deprivation (tertiles, unknown), alcohol intake (none, <1, 1-<10, 10-<20,  $\geq 20$  grams per day, unknown), height cm (sex-specific tertiles, unknown), BMI kg/m<sup>2</sup> (<20, 20-24, 25-29,  $\geq 30$ ), physical activity (<10 excess METs, 10-<50 excess METs,  $\geq 50$  excess METs, unknown), qualification (national examination at age 16, national examination at ages 17-18, vocational qualification, college or university degree, other, unknown), HRT (never, past, current, unknown), self-reported high blood pressure (no, yes, unknown), and energy intake (sex-specific quintiles)

## Appendix 4 – Results sensitivity analysis mortality RR

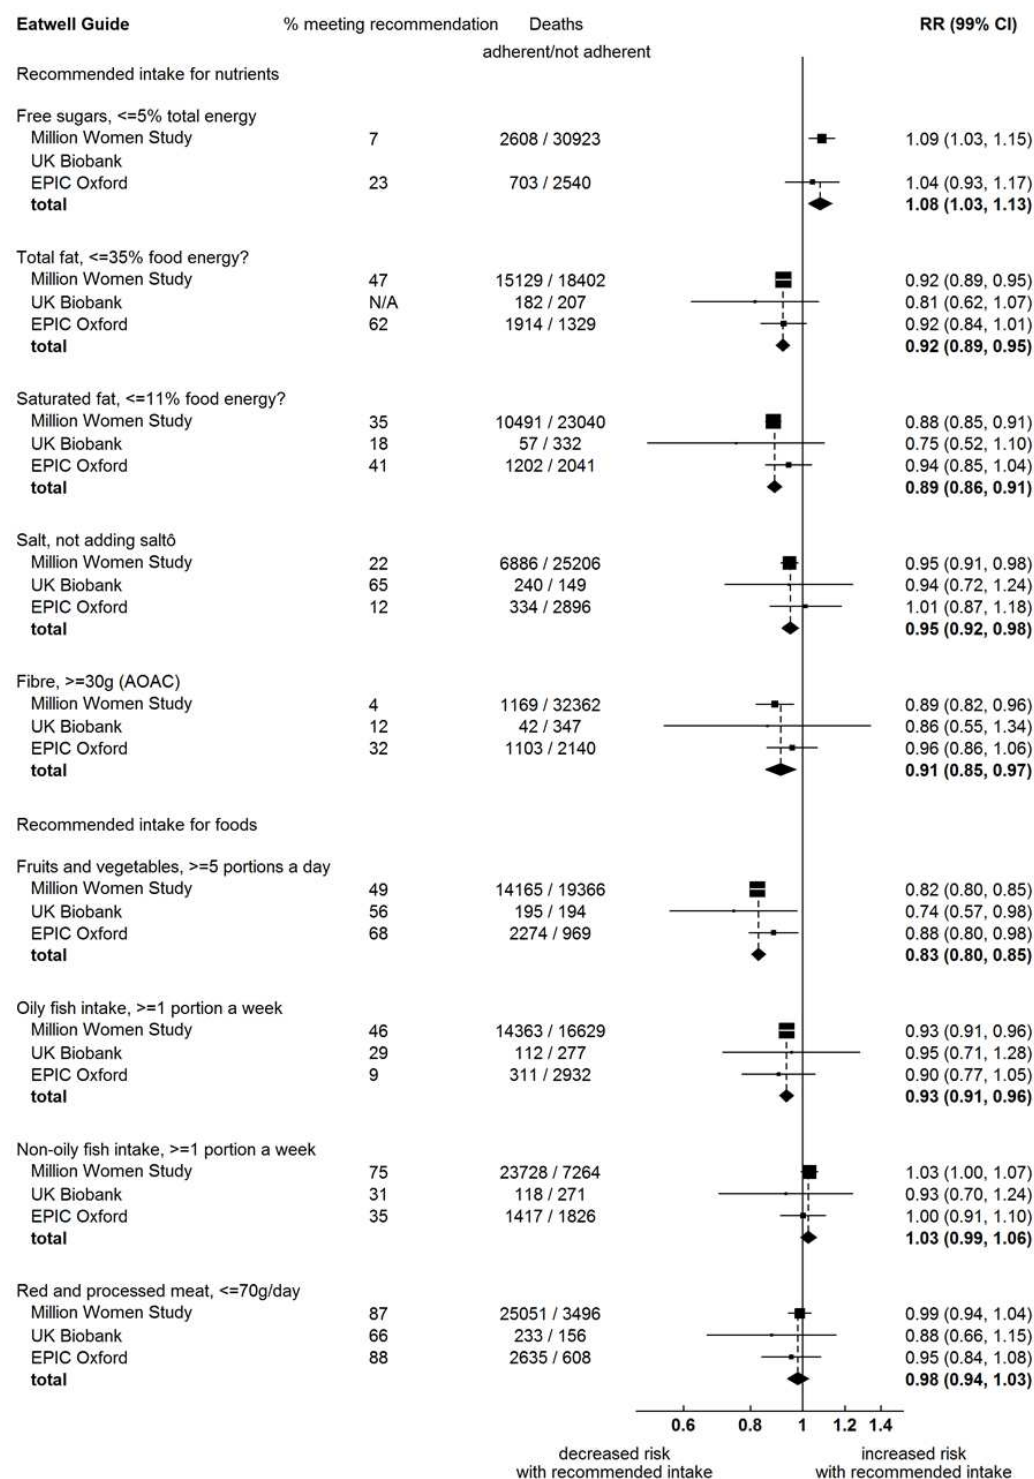Figure S 1 Risk ratios for the association between some recommendations of the Eatwell Guide and total mortality without adjustment for smoking

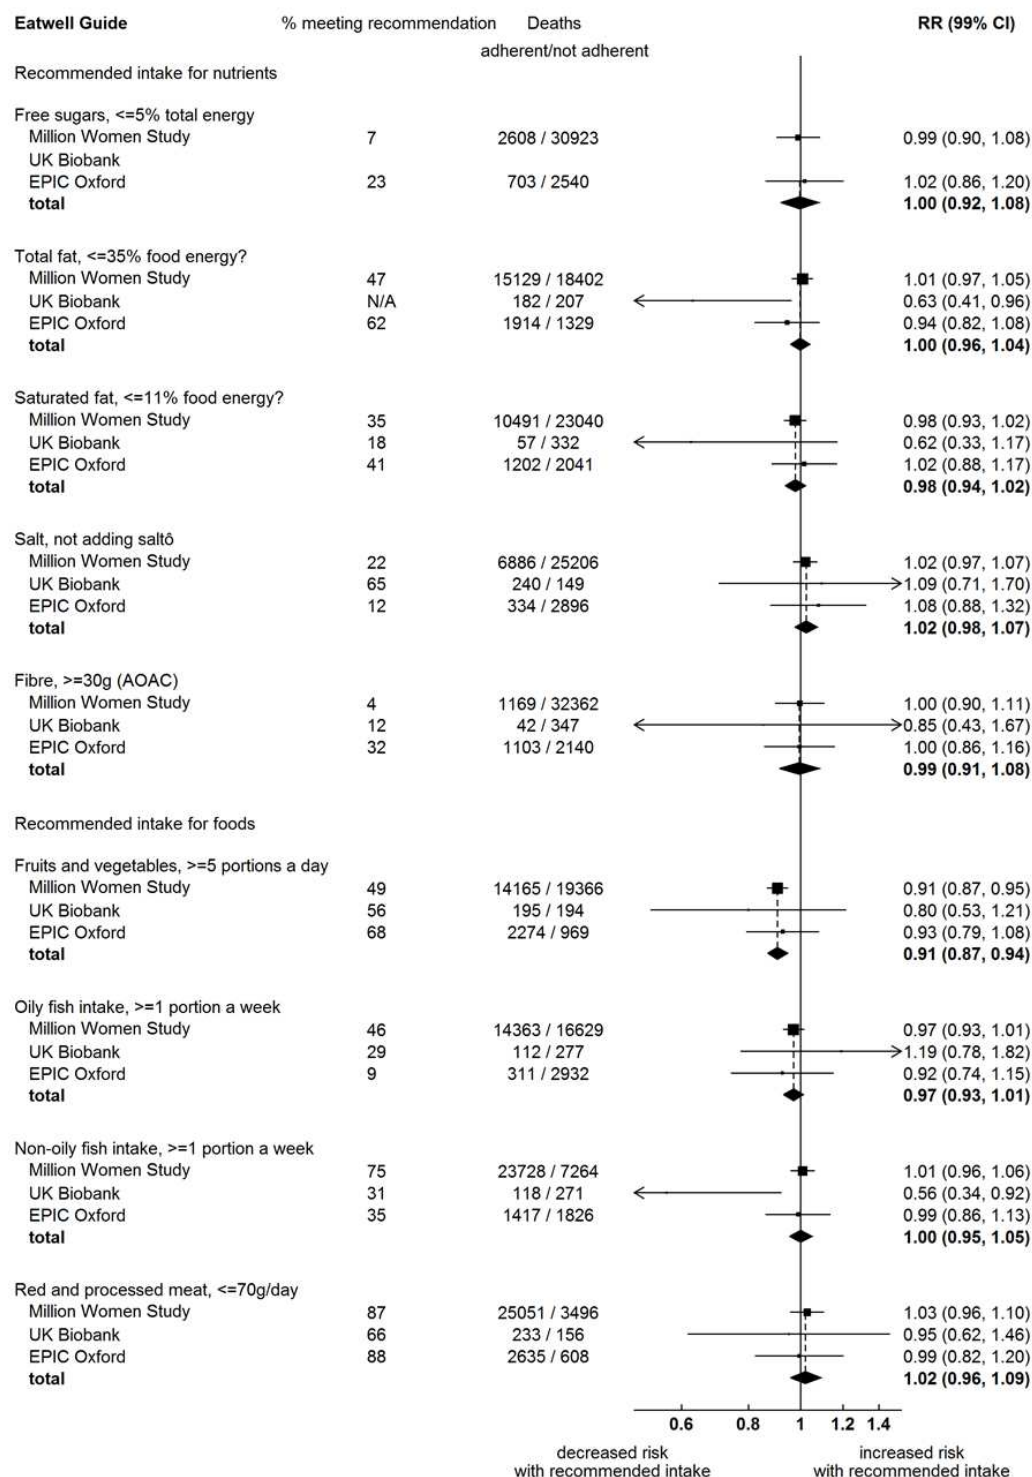

**Figure S 2 Risk ratios for the association between some recommendations of the Eatwell Guide and total mortality in never smokers**



## Risk ratios for the association some recommendations of the Eatwell Guide and total mortality

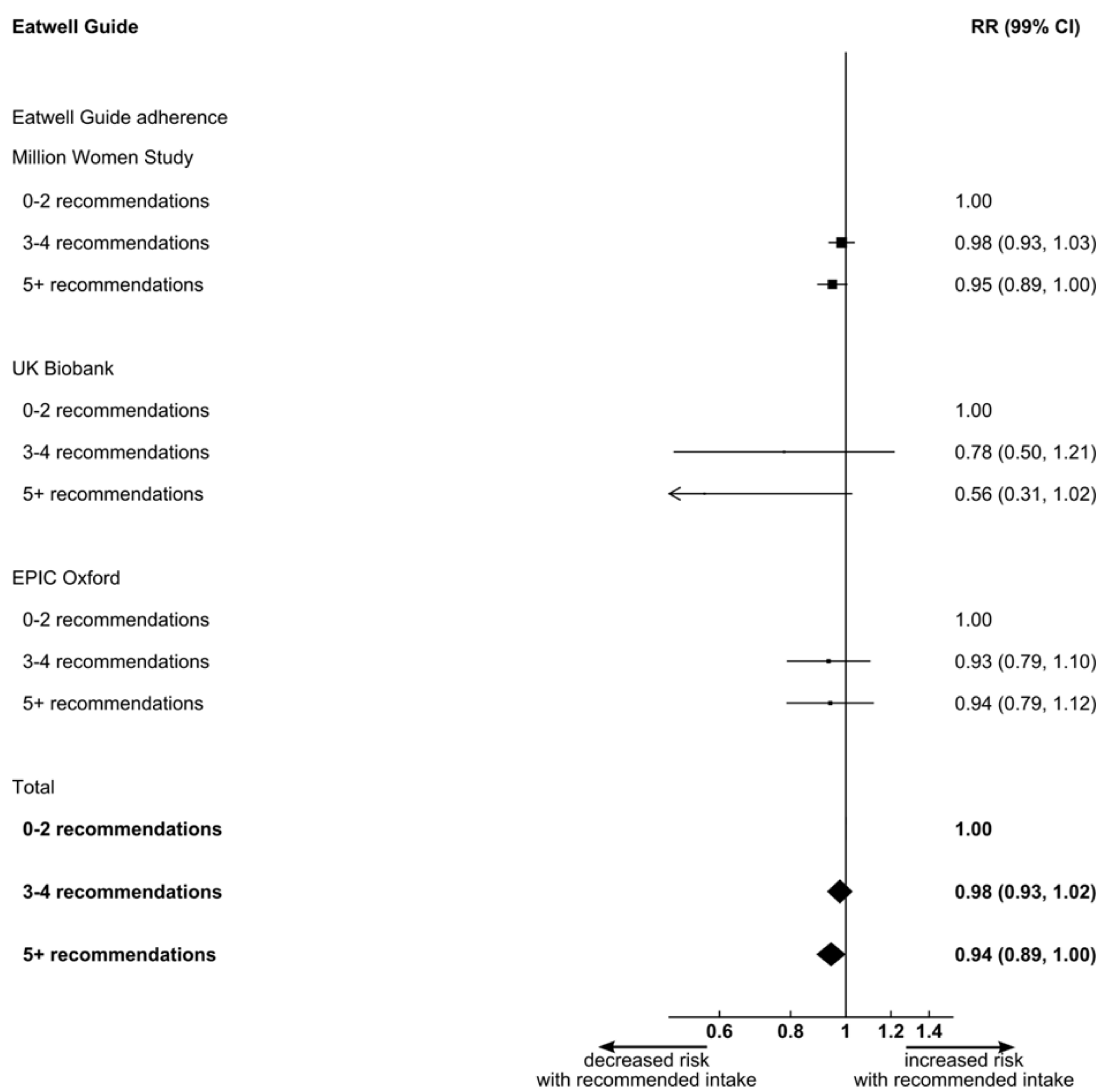

**Figure S 3 Risk ratios for the association between the Eatwell Guide three level score and total mortality in never smokers**

### Appendix 5 – Detailed GHG emission and WFP calculations

Data from NDNS were matched to food-specific GHG emissions and blue water footprint estimates from previous studies using 173 SubFoodGroups available in the NDNS dataset. Where SubFoodGroups contained a number of foods with differing environmental footprints, weighted means according to consumption were used, and similarly where SubFoodGroups were composite foods including many ingredients (e.g. meat pies) recipe data were used to estimate the mean proportions of ingredients contained within the composite food. Recipe data were obtained from Sainsbury's ([www.sainsbury.co.uk](http://www.sainsbury.co.uk)). Composite food and weighting data are available on request.

A number of additional SubFoodGroup categories were created in order to distinguish between categories where environmental footprints would be expected to differ greatly. These were:

- SubFoodGroup **6A** (wheat based breakfast cereals), **6B** (chocolate breakfast cereals), **6C** (oat based breakfast cereals), **6D** (maize based breakfast cereals), and **6E** (rice based breakfast cereals) were added in MainFoodGroup 6 (other breakfast cereals)
- SubFoodGroup **5A** (wheat based high fibre breakfast cereals), **5B** (chocolate high fibre breakfast cereals), **5C** (oat based high fibre breakfast cereals), and **5D** (rice based high fibre breakfast cereals) were added in MainFoodGroup 5 (high fibre breakfast cereals) and SubFoodGroup 5R was renamed (other high fibre breakfast cereals)
- SubFoodGroup **7C** (biscuits chocolate retail) was added in MainFoodGroup 7 (biscuits).
- SubFoodGroup **8F** (cakes chocolate) was added in MainFoodGroup 8 (buns cakes pastries and fruit pies)
- SubFoodGroups **13C** (non-dairy cream), **13D** (almond milk), **13E** (soya milk), **13F** (other non-dairy milk) and **13G** (chocolate milk) were added in MainFoodGroup 13 (other milk and cream) – Elmlea is not included in non dairy cream as it contains buttermilk
- SubFoodGroup **14C** (dairy free cheese) was added in MainFoodGroup 14 (cheese)
- SubFoodGroup **15E** (non dairy desserts) was added in MainFoodGroup 15 (yoghurt fromage frais and dairy desserts)
- SubFoodGroup **19B** (less than 1% dairy low fat spread) was added in MainFoodGroup 19 (low fat spread)
- SubFoodGroup **20A** (block margarine) was included in the dairy-free categories
- SubFoodGroup **20C** (other cooking fats and oils not PUFA) was renamed (other vegetable fats and oils) and a new SubFoodGroup **20B** (animal fats) was added in MainFoodGroup 20 (other margarine fats and oils)
- SubFoodGroup **21C** (less than 1% dairy reduced fat spread) was added in MainFoodGroup 21 (reduced fat spread)
- SubFoodGroup 37C (baked beans with sausages), moved to SubFoodGroup **25A** (manufactured pork products including ready meals) and categorised into MainFoodGroup 25 (pork products).
- SubFoodGroup **53A** (non dairy ice cream) was added in MainFoodGroup 53 (ice cream)

Codes 13A (infant formula), 54B (evening primrose oil and other plant oils), 54D (folic acid), 54E (iron only or with vitamin C), 54F (calcium only or with vitamin D), 54G (vitamins (two or

more including multivitamins), no minerals), 54H (minerals (two or more including multivitamins), no vitamins), 54I (vitamins and minerals (including multivitamins and minerals)), 54J (non-nutrient supplements including herbal), 54K (other nutrient supplements), 54L (vitamin C only), 54M (other single vitamins or minerals), 54N (cod liver oil and other fish oils), 54P (multivitamins and/or minerals with omega 3),

| SubFood<br>GroupCode | Food Group Name                             | Mean Greenhouse Gas<br>emissions (kg) per kg food | Mean blue water footprint<br>(litres) per kg food |
|----------------------|---------------------------------------------|---------------------------------------------------|---------------------------------------------------|
| 1C                   | Pizza                                       | 3.51                                              | 369                                               |
| 1D                   | Pasta manufactured products and ready meals | 1.00                                              | 0                                                 |
| 1E                   | Other pasta including homemade dishes       | 1.00                                              | 0                                                 |
| 1F                   | Rice manufactured products and ready meals  | 3.13                                              | 1071                                              |
| 1G                   | Other rice including homemade dishes        | 3.13                                              | 1071                                              |
| 1R                   | Other cereals                               | 1.18                                              | 103                                               |
| 2R                   | White bread (not high fibre, not multiseed) | 0.97                                              | 0                                                 |
| 3R                   | Wholemeal bread                             | 0.97                                              | 0                                                 |
| 4R                   | Other bread                                 | 0.97                                              | 0                                                 |
| 5A                   | Wheat based high fibre breakfast cereals    | 1.40                                              | 229                                               |
| 5B                   | Chocolate high fibre breakfast cereals      | 2.68                                              | 62                                                |
| 5C                   | Oat based high fibre breakfast cereals      | 1.41                                              | 109                                               |
| 5R                   | Other high fibre breakfast cereals          | 1.27                                              | 2                                                 |
| 6A                   | Wheat based breakfast cereals               | 1.40                                              | 0                                                 |
| 6B                   | Chocolate breakfast cereals                 | 3.03                                              | 779                                               |
| 6C                   | Oat based breakfast cereals                 | 1.41                                              | 109                                               |
| 6D                   | Maize based breakfast cereals               | 2.64                                              | 124                                               |
| 6E                   | Rice based breakfast cereals                | 2.85                                              | 1009                                              |
| 6R                   | Other breakfast cereals (not high fibre)    | 1.27                                              | 2                                                 |
| 7A                   | Biscuits manufactured / retail              | 1.80                                              | 143                                               |
| 7B                   | Biscuits homemade                           | 2.30                                              | 201                                               |
| 7C                   | Biscuits chocolate retail                   | 8.14                                              | 135                                               |
| 8B                   | Fruit pies manufactured                     | 0.95                                              | 86                                                |
| 8C                   | Fruit pies homemade                         | 1.11                                              | 91                                                |
| 8D                   | Buns cakes and pastries manufactured        | 1.08                                              | 66                                                |
| 8E                   | Buns cakes and pastries homemade            | 3.31                                              | 34                                                |
| 8F                   | Cakes chocolate                             | 3.11                                              | 126                                               |
| 9C                   | Cereal based milk puddings manufactured     | 2.00                                              | 170                                               |
| 9D                   | Cereal based milk puddings homemade         | 2.00                                              | 170                                               |

|     |                                                 |       |     |
|-----|-------------------------------------------------|-------|-----|
| 9E  | Sponge puddings manufactured                    | 1.79  | 17  |
| 9F  | Sponge puddings homemade                        | 1.79  | 17  |
| 9G  | Other cereal based puddings manufactured        | 4.00  | 26  |
| 9H  | Other cereal based puddings homemade            | 0.08  | 1   |
| 10R | Whole milk                                      | 1.53  | 28  |
| 11R | Semi skimmed milk                               | 1.53  | 24  |
| 12R | Skimmed milk                                    | 1.53  | 24  |
| 13B | Cream (including imitation cream)               | 4.89  | 44  |
| 13C | Non dairy cream alternative                     | 2.64  | 6   |
| 13D | Almond milk                                     | 0.99  | 73  |
| 13E | Soya milk                                       | 0.88  | 2   |
| 13F | Other non-dairy milk                            | 2.65  | 57  |
| 13G | Chocolate milk                                  | 1.53  | 24  |
| 13R | Other milk                                      | 1.80  | 109 |
| 14A | Cottage cheese                                  | 15.00 | 132 |
| 14B | Cheddar cheese                                  | 8.87  | 132 |
| 14C | Dairy free cheese alternative                   | 1.76  | 4   |
| 14R | Other cheese                                    | 8.87  | 59  |
| 15B | Yoghurt                                         | 2.00  | 31  |
| 15C | Fromage frais and dairy desserts                | 2.00  | 27  |
| 15D | Dairy desserts homemade                         | 1.32  | 81  |
| 15E | Non dairy desserts                              | 2.05  | 94  |
| 16C | Manufactured egg products including ready meals | 3.51  | 4   |
| 16D | Other eggs and egg dishes including homemade    | 4.70  | 39  |
| 17R | Butter                                          | 9.00  | 194 |
| 18B | Polyunsaturated oils                            | 3.59  | 235 |
| 19A | Polyunsaturated low fat spread                  | 4.19  | 127 |
| 19B | Less than 1% dairy low fat spread               | 4.19  | 144 |
| 19R | Low fat spread not polyunsaturated              | 3.95  | 127 |
| 20A | Block margarine                                 | 4.19  | 144 |
| 20B | Animal fats                                     | 14.31 | 162 |
| 20C | Other vegetable fats and oils                   | 4.65  | 853 |
| 21A | Reduced fat spread (polyunsaturated)            | 4.35  | 146 |
| 21B | Reduced fat spread (not polyunsaturated)        | 4.35  | 146 |
| 21C | Less than 1% dairy reduced fat spread           | 4.19  | 144 |

|     |                                                         |       |     |
|-----|---------------------------------------------------------|-------|-----|
| 22A | Ready meals / meal centres based on bacon and ham       | 7.47  | 304 |
| 22B | Other bacon and ham including homemade dishes           | 10.70 | 321 |
| 23A | Manufactured beef products including ready meals        | 10.40 | 127 |
| 23B | Other beef and veal including homemade recipe dishes    | 16.50 | 205 |
| 24A | Manufactured lamb products including ready meals        | 30.48 | 275 |
| 24B | Other lamb including homemade recipe dishes             | 50.00 | 446 |
| 25A | Manufactured pork products including ready meals        | 8.85  | 321 |
| 25B | Other pork including homemade recipe dishes             | 10.00 | 293 |
| 26A | Manufactured coated chicken / turkey products           | 3.12  | 80  |
| 27A | Manufactured chicken products including ready meals     | 3.50  | 38  |
| 27B | Other chicken / turkey including homemade recipe dishes | 3.50  | 38  |
| 28R | Liver and dishes                                        | 8.85  | 59  |
| 29R | Burgers and kebabs purchased                            | 34.80 | 252 |
| 30A | Ready meals based on sausages                           | 4.80  | 139 |
| 30B | Other sausages including homemade dishes                | 8.85  | 321 |
| 31A | Manufactured meat pies and pastries                     | 8.63  | 209 |
| 31B | Homemade meat pies and pastries                         | 13.96 | 251 |
| 32A | Other meat products manufactured including ready meals  | 11.50 | 594 |
| 32B | Other meat including homemade recipe dishes             | 2.84  | 37  |
| 33R | White fish coated or fried                              | 3.36  | 0   |
| 34C | Manufactured white fish products including ready meals  | 4.55  | 0   |
| 34D | Other white fish including homemade dishes              | 4.55  | 0   |
| 34E | Manufactured shellfish products including ready meals   | 24.00 | 142 |
| 34F | Other shellfish including homemade dishes               | 24.00 | 142 |
| 34G | Manufactured canned tuna products including ready meals | 4.55  | 0   |
| 34H | Other canned tuna including homemade dishes             | 4.55  | 0   |

|     |                                                             |      |     |
|-----|-------------------------------------------------------------|------|-----|
| 35A | Manufactured oily fish products including ready meals       | 4.55 | 256 |
| 35B | Other oily fish including homemade dishes                   | 4.55 | 256 |
| 36A | Carrots raw                                                 | 1.28 | 0   |
| 36B | Salad and other raw vegetables                              | 0.68 | 16  |
| 36C | Tomatoes raw                                                | 0.96 | 36  |
| 37A | Peas not raw                                                | 2.55 | 13  |
| 37B | Green beans not raw                                         | 0.50 | 40  |
| 37C | Baked beans                                                 | 2.15 | 428 |
| 37D | Leafy green vegetables not raw                              | 0.73 | 23  |
| 37E | Carrots not raw                                             | 1.28 | 0   |
| 37F | Tomatoes not raw                                            | 0.96 | 36  |
| 37I | Beans and pulses including ready meals and homemade dishes  | 1.51 | 21  |
| 37K | Meat alternatives including ready meals and homemade dishes | 3.60 | 200 |
| 37L | Other manufactured vegetable products including ready meals | 1.60 | 7   |
| 37M | Other vegetables including homemade dishes                  | 0.58 | 39  |
| 38A | Chips purchased including take away                         | 1.45 | 30  |
| 38C | Other manufactured potato products fried / baked            | 1.46 | 17  |
| 38D | Other fried / roast potatoes including homemade dishes      | 3.08 | 17  |
| 39A | Other potato products and dishes manufactured               | 1.20 | 46  |
| 39B | Other potatoes including homemade dishes                    | 1.20 | 19  |
| 40A | Apples and pears not canned                                 | 0.70 | 52  |
| 40B | Citrus fruit not canned                                     | 0.40 | 93  |
| 40C | Bananas                                                     | 0.90 | 49  |
| 40D | Canned fruit in juice                                       | 1.32 | 218 |
| 40E | Canned fruit in syrup                                       | 1.32 | 218 |
| 40R | Other fruit not canned                                      | 1.63 | 82  |
| 41A | Sugar                                                       | 0.32 | 1   |
| 41B | Preserves                                                   | 2.96 | 206 |
| 41R | Sweet spreads fillings and icing                            | 7.14 | 269 |
| 42R | Crisps and savoury snacks                                   | 2.47 | 92  |
| 43R | Sugar confectionery                                         | 0.32 | 1   |
| 44R | Chocolate confectionery                                     | 1.07 | 78  |

|     |                                               |      |      |
|-----|-----------------------------------------------|------|------|
| 45R | Fruit juice                                   | 1.01 | 157  |
| 47A | Liqueurs                                      | 1.00 | 1    |
| 47B | Spirits                                       | 1.00 | 1    |
| 48A | Wine                                          | 1.00 | 1    |
| 48B | Fortified wine                                | 1.00 | 1    |
| 48C | Low alcohol and alcohol free wine             | 1.00 | 1    |
| 49A | Beers and lagers                              | 3.80 | 14   |
| 49B | Low alcohol and alcohol free beer and lager   | 3.80 | 14   |
| 49C | Cider and perry                               | 0.08 | 1    |
| 49D | Low alcohol and alcohol free cider and perry  | 3.80 | 1    |
| 49E | Alcoholic soft drinks                         | 0.80 | 28   |
| 50A | Beverages dry weight                          | 1.80 | 119  |
| 50C | Soup manufactured / retail                    | 1.25 | 27   |
| 50D | Soup homemade                                 | 0.47 | 6    |
| 50E | Nutrition powders and drinks                  | 0.00 | 0    |
| 50R | Savoury sauces pickles gravies and condiments | 1.54 | 27   |
| 51A | Coffee (made up weight)                       | 0.79 | 1955 |
| 51B | Tea (made up weight)                          | 0.33 | 221  |
| 51C | Herbal tea (made up weight)                   | 0.40 | 1    |
| 51D | Bottled water still or carbonated             | 0.40 | 1    |
| 51R | Tap water only                                | 1.00 | 1    |
| 52A | Commercial toddlers drinks                    | 0.00 | 0    |
| 52R | Commercial toddlers foods                     | 0.00 | 0    |
| 53A | Non dairy ice cream                           | 2.05 | 94   |
| 53R | Ice cream                                     | 3.82 | 44   |
| 55R | Artificial sweeteners                         | 3.20 | 487  |
| 56R | Nuts and seeds                                | 1.57 | 1415 |
| 57A | Soft drinks not low calorie concentrated      | 0.40 | 1    |
| 57B | Soft drinks not low calorie carbonated        | 0.40 | 1    |
| 57C | Soft drinks not low calorie rtd still         | 0.40 | 1    |
| 58A | Soft drinks low calorie concentrated          | 0.40 | 1    |
| 58B | Soft drinks low calorie carbonated            | 0.40 | 1    |
| 58C | Soft drinks low calorie rtd still             | 0.40 | 1    |
| 59R | Brown granary and wheatgerm bread             | 0.97 | 0    |
| 60R | 1% fat milk                                   | 1.53 | 23   |
| 61R | Smoothies 100% fruit and / or juice           | 1.05 | 54   |





### Appendix 6 - References for GHG and Blue WF figures

Amienyo D, Gujba H, Stichnothe H and Azapagic A (2013). Life cycle environmental impacts of carbonated soft drinks. *International Journal of Life Cycle Assessment* 18(1): 77-92.

Azapagic A, Bore J, Cheserek B, Kamunya S and Elbehri A (2016). The global warming potential of production and consumption of Kenyan tea. *Journal of Cleaner Production* 112(5): 4031-4040.

Bartzas G, Vamvuka D and Kommitsas K (2017). Comparative life cycle assessment of pistachio, almond and apple production. *Information Processing in Agriculture* 4(3): 188-198.

Bronmer E, Stratmann B and Quack D (2011). Environmental impacts of different methods of coffee preparation. *International Journal of Consumer Studies* 35(2): 212-220.

Buschspies B, Tolle SJ and Jungbluth N (2011). *Life Cycle Assessment of High-Sea Fish and Salmon Aquaculture*. ESU Services, Uster.

Carbon Trust (2017). *Report to Marlow Foods on Product Carbon Footprint Certification*.

Cichorowski G, Joa B, Hottenroth H and Schmidt M (2015). Scenario analysis of life cycle greenhouse gas emissions of Darjeeling tea. *International Journal of Life Cycle Assessment* 20(4): 426-439.

Clune S, Crossin E and Verghese K (2017). Systematic review of greenhouse gas emissions for different fresh food categories. *Journal of Cleaner Production* 140(2): 766-783.

Djekic I, Miocinovic J, Tomasevic I, Smigic N and Tomic N (2014). Environmental life-cycle assessment of various dairy products. *Journal of Cleaner Production* 68: 64-72.

Doublet G and Jungbluth N (2010). *Life Cycle Assessment of Drinking Darjeeling Tea*. ESU-Services, Uster.

Espinoza-Orias N, Stichnothe H and Azapagic A (2011). The carbon footprint of bread. *International Journal of Life Cycle Assessment* 16(4): 351-365.

Fantin V, Buttol P, Pergreff R and Masoni P (2012). Life cycle assessment of Italian high quality milk production. A comparison with an EPD study. *Journal of Cleaner Production* 28: 150-159.

Finnegan W, Goggins J, Clifford E and Zhan X (2017). Global warming potential associated with dairy products in the Republic of Ireland. *Journal of Cleaner Production* 163: 262-273.

Frankowska A, Jeswani HK and Azapagic A (2019). Environmental impacts of vegetables consumption in the UK. *Science of the Total Environment* 682: 80-105.

Gonzalez-Garcia S, Gomez-Fernandez Z, Dias AC, Feijoo G, Moreira MT and Arroja L (2014). Life Cycle Assessment of broiler chicken production: a Portuguese case study. *Journal of Cleaner Production* 74: 125-134.

Huerta AR, Guereca LP and Lozano MSR (2016). Environmental impact of beef production in Mexico through life cycle assessment. *Resources, Conservation and Recycling* 109: 44-53.

Humbert S, Loerencik Y, Rossi V, Margni M and Jolliet O (2009). Life cycle assessment of spray dried soluble coffee and comparison with alternatives (drip filter and capsule espresso). *Journal of Cleaner Production* 17(15): 1351-1358.

- Iriarte A, Almeida MG and Villalobos P (2014). Carbon footprint of premium quality export bananas: case study in Ecuador, the world's largest exporter. *Science of the Total Environment* 472: 1082-1088.
- Jeswani HK, Burkinshaw R and Azapagic A (2015). Environmental sustainability issues in the food-energy-water nexus: breakfast cereals and snacks. *Sustainable Production and Consumption* 2: 17-28.
- Jungbluth N (2006). *Comparison of the Environmental Impact of Tap Water vs. Bottled Mineral Water*. Swiss Gas and Water Association, Uster.
- Kendall A, Marvinney E, Brodt S and Zhu W (2015). Life cycle-based assessment of energy use and greenhouse gas emissions in almond production, part I: analytical framework and baseline results. *Journal of Industrial Ecology* 19(6): 1008-1018.
- Konstantas A, Stamford L and Azapagic A (2019). Economic sustainability of food supply chains: life cycle costs and value added in the confectionery and frozen desserts sectors. *Science of the Total Environment* 670: 902-914.
- Konstantas A, Jeswani HK, Stamford L and Azapagic A (2018). Environmental impacts of chocolate production and consumption in the UK. *Food Research International* 106: 1012-1025.
- Kristensen T, Soegaard K, Eriksen J and Mogensen L (2015). Carbon footprint of cheese produced on milk from Holstein and Jersey cows fed hay differing in herb content. *Journal of Cleaner Production* 101: 229-237.
- Leinonen I, Williams AG, Wiseman J, Guy J and Kyriazakis I (2012). Predicting the environmental impacts of chicken systems in the United Kingdom through a life cycle assessment: Broiler production systems. *Poultry Science* 91(1): 8-25.
- McCarty JA, Sandefur HN, Matlock M, Thoma G and Kim D (2014). Life cycle assessment of greenhouse gas emissions associated with production and consumption of peanut butter in the US. *Transactions of the ASABE* 57(6): 1741-1750.
- Mekonnen MM and Hoekstra AY (2011). The green, blue and grey water footprint of crops and derived crop products. *Hydrology and Earth System Sciences* 15(5): 1577-1600.
- Mekonnen MM and Hoekstra AY (2012). A global assessment of the water footprint of farm animal products. *Ecosystems* 15(3): 401-415.
- Nguyen TLT, Hermansen JE and Mogensen E (2010). Environmental consequences of different beef production systems in the EU. *Journal of Cleaner Production* 18(8): 756-766.
- Nilsson K, Flysjo A, Davis J, Sim S, Unger N and Bell S (2010). Comparative life cycle assessment of margarine and butter consumed in the UK, Germany and France. *International Journal of Life Cycle Assessment* 15(9): 916-926.
- Nilsson K, Sund V and Floren B (2011). *The Environmental Impact of the Consumption of Sweets, Crisps and Soft Drinks*. Nordic Council of Ministers, Copenhagen.
- Noya I, Aldea X, Gasol CM, Gonzalez-Garcia S, Amores MJ, Colon J, Ponsa S, Roman I, Rubio MA, Casas E, Moreira MT and Boschmonart-Rives J (2016). Carbon and water footprint of pork supply chain in Catalonia: From feed to final products. *Journal of Environmental Management* 171: 133-143.

Opio C, Gerber P, Mottet A, Falcucci A, Tempio G, MacLeod M, Vellinga T, Henderson B and Steinfeld H (2013). *Greenhouse gas emissions from ruminant supply chains – A global life cycle assessment*. Food and Agriculture Organization of the United Nations (FAO), Rome.

Pahlow M, van Oel PR, Mekonnen MM and Hoekstra AY (2015). Increasing pressure on freshwater resources due to terrestrial feed ingredients for aquaculture production. *Science of the Total Environment* 536: 847-857.

Poore J and Nemecek T (2018). Reducing food's environmental impacts through producers and consumers. *Science* 360: 987-992.

Prudencio da Silva V, van der Werf HMG, Soares SR and Corson MS (2014). Environmental impacts of French and Brazilian broiler chicken scenarios: An LCA approach. *Journal of Environmental Management* 133: 222-231.

Recanti F, Marveggio D and Dotelli G (2018). From beans to bar: a life cycle assessment towards sustainable chocolate supply chain. *Science of the Total Environment* 613-614: 1013-1023.

Recchia L, Cappelli A, Cini E, Pegna FG and Boncinelli P (2019). Environmental sustainability of pasta production chains: an integrated approach for comparing local and global chains. *Resources* 8(1): 56.

Scarborough P, Appleby PN, Mizdrak A, Briggs ADM, Travis RC, Bradbury KE and Key TJ (2014). Dietary greenhouse gas emissions of meat-eaters, fish-eaters, vegetarians and vegans in the UK. *Climatic Change* 125(2): 179-192.

Seabra JEA, Macedo IC, Chum HL, Faroni CE and Sarto CA (2011). Life cycle assessment of Brazilian sugarcane products: GHG emissions and energy use. *Biofuels, Bioproducts and Biorefining* 5(5): 519-532.

Sheane R, Lewis K, Hall P, Holmes-Ling P, Kerr A, Stewart K and Webb D (2011). *Identifying Opportunities to Reduce the Carbon Footprint Associated with the Scottish Dairy Chain – Main Report*. Edinburgh: Scottish Government.

Svanes E and Aronsson AKS (2013). Carbon footprint of a Cavendish banana supply chain. *International Journal of Life Cycle Assessment* 18(8): 1450-1464.

Wiedemann S, McGahan E, Murphy C, Yan M-J, Henry B, Thoma G and Ledgard S (2015). Environmental impacts and resource use of Australian beef and lamb exported to the USA determined using life cycle assessment. *Journal of Cleaner Production* 94: 67-75.

Ziegler F, Winther U, Skontorp Hognes E, Emmanuelsson A, Sund V, Ellingsen H (2012). The carbon footprint of Norwegian seafood products on the global seafood market. *Journal of Industrial Ecology* 17(1): 103-116

**Appendix 7A – Calculation of weighted GHG and water footprint of the food group aggregate “fruit and vegetables” – based on proportional supply by crop and country of origin (FAOStat 2013 data)**

| Crops                                        | % of total supply | GHG per kg | Blue WF per kg |
|----------------------------------------------|-------------------|------------|----------------|
| Tomatoes                                     | 13.4              | 0.96       | 36             |
| Bananas                                      | 7.8               | 1.07       | 49             |
| Grapes**                                     | 6.3               | 1.34       | 298            |
| Apples                                       | 6.1               | 0.75       | 77             |
| Onions, dry                                  | 6.0               | 0.76       | 36             |
| Carrots and turnips                          | 5.8               | 1.28       | 0              |
| Oranges                                      | 5.0               | 0.4        | 93             |
| Cauliflowers and broccoli                    | 2.5               | 1.03       | 53             |
| Cabbages and other brassicas                 | 2.5               | 0.67       | 7              |
| Lettuce and chicory                          | 2.3               | 1.59       | 41             |
| Tangerines, mandarins, clementines, satsumas | 2.0               | 0.4        | 93             |
| Mushrooms and truffles                       | 1.6               | 0.76       | 2              |
| Chillies and peppers, green                  | 1.6               | 0.76       | 2              |
| Cucumbers and gherkins                       | 1.5               | 0.2        | 12             |
| Olives**                                     | 1.4               | 1.34       | 298            |
| Pineapples**                                 | 1.4               | 1.34       | 298            |
| Maize, green                                 | 1.3               | 0.76       | 2              |
| Peas, green                                  | 1.3               | 2.55       | 23             |
| Pears**                                      | 1.3               | 0.75       | 77             |
| Melons, other (inc.cantaloupes)**            | 1.1               | 1.34       | 298            |
| Strawberries                                 | 1.0               | 1.7        | 28             |
| Lemons and limes                             | 0.84              | 1.01       | 157            |
| Plums and sloes                              | 0.82              | 1.7        | 28             |
| Pumpkins, squash and gourds                  | 0.75              | 0.5        | 55             |
| Peaches and nectarines**                     | 0.64              | 1.34       | 298            |
| Grapefruit (inc. pomelos)                    | 0.60              | 0.4        | 93             |
| Watermelons**                                | 0.53              | 1.34       | 298            |
| Apricots**                                   | 0.46              | 1.34       | 298            |
| Sweet potatoes                               | 0.46              | 0.5        | 55             |
| Leeks, other alliaceous vegetables           | 0.42              | 0.71       | 15             |
| Mangoes, mangosteens, guavas**               | 0.41              | 1.34       | 298            |
| Beans, green                                 | 0.36              | 0.5        | 6              |
| Avocados**                                   | 0.25              | 1.34       | 298            |
| Onions, shallots, green*                     | 0.24              | 0.76       | 36             |

\* all other crops contribute less than 0.2% to total UK supply and were disregarded for calculations of weighted GHGs and WF of the fruit and vegetables aggregate.

\*\* Classified as “other fruit” or “other vegetables” - without specific WFs

**Appendix 7B - Proportions of main UK imported foods from different countries**

For each food group, countries of origin were selected based on a database adapted from FAO Food Balance Sheet data (<https://iopscience.iop.org/article/10.1088/1748-9326/9/3/034015/meta>). All countries providing at least 10% of the total availability for that food group were included in environmental footprinting, and for the remainder of supply global average figures were applied. Where country-specific footprint data were not available, footprints from the most similar country or a global average were applied.

| Food        | Country      | Proportion of UK consumption |
|-------------|--------------|------------------------------|
| ALMONDS     | USA          | 0.72                         |
|             | Australia    | 0.1                          |
|             | Spain        | 0.14                         |
|             | Global       | 0.04                         |
| APPLE JUICE | France       | 0.14                         |
|             | South Africa | 0.1                          |
|             | UK           | 0.36                         |
|             | Global       | 0.4                          |
| APPLES      | France       | 0.14                         |
|             | South Africa | 0.1                          |
|             | UK           | 0.36                         |
|             | Global       | 0.4                          |
| ASPARAGUS   | Mexico       | 0.11                         |
|             | Peru         | 0.46                         |
|             | Spain        | 0.12                         |
|             | UK           | 0.26                         |
|             | Global       | 0.05                         |
| AVOCADO     | Chile        | 0.22                         |
|             | Israel       | 0.16                         |
|             | Peru         | 0.21                         |
|             | South Africa | 0.27                         |
|             | Global       | 0.14                         |
| BANANAS     | Colombia     | 0.23                         |

|                      |                    |      |
|----------------------|--------------------|------|
|                      | Costa Rica         | 0.18 |
|                      | Dominican Republic | 0.18 |
|                      | Ecuador            | 0.14 |
|                      | Global             | 0.27 |
| BARLEY               | UK                 | 0.81 |
|                      | Global             | 0.19 |
| BEEF                 | UK                 | 0.76 |
|                      | Ireland            | 0.17 |
|                      | Global             | 0.07 |
| BLUEBERRIES          | Netherlands        | 0.34 |
|                      | Poland             | 0.3  |
|                      | Global             | 0.45 |
| CAULIFLOWER/BROCCOLI | UK                 | 0.47 |
|                      | Spain              | 0.43 |
|                      | Global             | 0.1  |
| CHICKPEAS            | Argentina          | 0.11 |
|                      | Australia          | 0.21 |
|                      | Canada             | 0.14 |
|                      | Mexico             | 0.12 |
|                      | Global             | 0.42 |
| COFFEE               | Brazil             | 0.26 |
|                      | Colombia           | 0.1  |
|                      | Indonesia          | 0.13 |
|                      | Vietnam            | 0.25 |
|                      | Global             | 0.26 |
| COCOA BUTTER         | Ghana              | 0.27 |
|                      | Cote d'Ivoire      | 0.44 |
|                      | Nigeria            | 0.1  |
|                      | Global             | 0.19 |

|             |               |      |
|-------------|---------------|------|
| COCOA PASTE | Ghana         | 0.27 |
|             | Cote d'Ivoire | 0.44 |
|             | Nigeria       | 0.1  |
|             | Global        | 0.19 |
| COCONUTS    | Indonesia     | 0.24 |
|             | Malaysia      | 0.11 |
|             | Philippines   | 0.48 |
|             | Global        | 0.17 |
| CUCUMBERS   | Netherlands   | 0.34 |
|             | Spain         | 0.33 |
|             | UK            | 0.3  |
|             | Global        | 0.03 |
| GARLIC      | China         | 0.41 |
|             | Spain         | 0.52 |
|             | Global        | 0.07 |
| GRAPES      | Chile         | 0.1  |
|             | France        | 0.1  |
|             | Italy         | 0.15 |
|             | Spain         | 0.1  |
|             | Turkey        | 0.18 |
|             | Global        | 0.37 |
| GREEN BEANS | Egypt         | 0.15 |
|             | Kenya         | 0.32 |
|             | UK            | 0.32 |
|             | Global        | 0.21 |
| GROUNDNUTS  | USA           | 0.26 |
|             | Nicaragua     | 0.13 |
|             | China         | 0.14 |
|             | Argentina     | 0.33 |
|             | Global        | 0.14 |

|             |           |      |
|-------------|-----------|------|
| HAZELNUTS   | Georgia   | 0.18 |
|             | Italy     | 0.1  |
|             | Turkey    | 0.69 |
|             | Global    | 0.03 |
| LEMON JUICE | Argentina | 0.16 |
|             | Brazil    | 0.13 |
|             | Spain     | 0.47 |
|             | Global    | 0.24 |
| LEMONS      | Argentina | 0.16 |
|             | Brazil    | 0.13 |
|             | Spain     | 0.47 |
|             | Global    | 0.24 |
| LENTILS     | Canada    | 0.63 |
|             | Turkey    | 0.26 |
|             | Global    | 0.11 |
| LETTUCE     | Spain     | 0.49 |
|             | UK        | 0.4  |
|             | Global    | 0.11 |
| MAIZE       | France    | 0.27 |
|             | Ukraine   | 0.18 |
|             | Global    | 0.55 |
| MILLET      | Russia    | 0.32 |
|             | France    | 0.24 |
|             | Ukraine   | 0.13 |
|             | India     | 0.1  |
|             | Global    | 0.21 |
| NUTS, OTHER | China     | 0.13 |
|             | Turkey    | 0.3  |
|             | USA       | 0.12 |
|             | Global    | 0.45 |



|                      |                  |      |
|----------------------|------------------|------|
| OLIVE OIL            | Italy            | 0.18 |
|                      | Spain            | 0.59 |
|                      | Global           | 0.23 |
| ONIONS               | Netherlands      | 0.23 |
|                      | Spain            | 0.16 |
|                      | UK               | 0.44 |
|                      | Global           | 0.17 |
| ORANGE JUICE         | Brazil           | 0.3  |
|                      | South Africa     | 0.13 |
|                      | Spain            | 0.28 |
|                      | USA              | 0.1  |
|                      | Global           | 0.19 |
| ORANGES              | Brazil           | 0.3  |
|                      | South Africa     | 0.13 |
|                      | Spain            | 0.28 |
|                      | USA              | 0.1  |
|                      | Global           | 0.19 |
| PALM OIL             | Indonesia        | 0.43 |
|                      | Malaysia         | 0.28 |
|                      | Papua New Guinea | 0.2  |
|                      | Global           | 0.09 |
| PEACHES              | Italy            | 0.14 |
|                      | Spain            | 0.73 |
|                      | Global           | 0.13 |
| PEARS                | Netherlands      | 0.32 |
|                      | South Africa     | 0.17 |
|                      | UK               | 0.13 |
|                      | Global           | 0.38 |
| PEPPERS AND CHILLIES | Netherlands      | 0.38 |
|                      | Spain            | 0.34 |

|                |              |      |
|----------------|--------------|------|
|                | UK           | 0.11 |
|                | Global       | 0.17 |
| PINEAPPLES     | Costa Rica   | 0.7  |
|                | Thailand     | 0.14 |
|                | Global       | 0.16 |
| POTATOES       | UK           | 0.72 |
|                | Netherlands  | 0.11 |
|                | Global       | 0.17 |
| PRUNES (PLUMS) | Chile        | 0.24 |
|                | Spain        | 0.16 |
|                | UK           | 0.11 |
|                | USA          | 0.14 |
|                | Global       | 0.35 |
| RAISINS        | Turkey       | 0.3  |
|                | USA          | 0.3  |
|                | South Africa | 0.1  |
|                | Chile        | 0.1  |
|                | Global       | 0.2  |
| RICE (WHITE)   | India        | 0.26 |
|                | Spain        | 0.18 |
|                | Italy        | 0.13 |
|                | Pakistan     | 0.11 |
|                | Global       | 0.32 |
| RICE (BROWN)   | India        | 0.26 |
|                | Spain        | 0.18 |
|                | Italy        | 0.13 |
|                | Pakistan     | 0.11 |
|                | Global       | 0.32 |
| SOYA PROTEIN   | Brazil       | 0.44 |
|                | Argentina    | 0.31 |

|                   |           |      |
|-------------------|-----------|------|
|                   | USA       | 0.16 |
|                   | Global    | 0.09 |
| SOYBEANS          | Argentina | 0.31 |
|                   | Brazil    | 0.44 |
|                   | USA       | 0.16 |
|                   | Global    | 0.09 |
| SOYBEANS FOR MILK | Brazil    | 0.44 |
|                   | Argentina | 0.31 |
|                   | USA       | 0.16 |
|                   | Global    | 0.09 |
| SPINACH           | Italy     | 0.11 |
|                   | Spain     | 0.7  |
|                   | Global    | 0.19 |
| SUGAR             | UK        | 0.38 |
|                   | Global    | 0.62 |
| SUNFLOWER OIL     | Argentina | 0.12 |
|                   | France    | 0.14 |
|                   | Ukraine   | 0.31 |
|                   | Global    | 0.43 |
| SUNFLOWER SEEDS   | Argentina | 0.12 |
|                   | France    | 0.14 |
|                   | Ukraine   | 0.31 |
|                   | Global    | 0.43 |
| TEA               | India     | 0.16 |
|                   | Indonesia | 0.15 |
|                   | Kenya     | 0.39 |
|                   | Global    | 0.3  |
| TOMATO PASTE      | Italy     | 0.39 |
|                   | Spain     | 0.2  |
|                   | Portugal  | 0.13 |

|             |          |      |
|-------------|----------|------|
|             | Global   | 0.28 |
| TOMATOES    | Italy    | 0.39 |
|             | Spain    | 0.2  |
|             | Portugal | 0.13 |
|             | Global   | 0.28 |
| WHEAT FLOUR | UK       | 0.67 |
|             | Global   | 0.33 |

Appendix 8 – Differences in EWG dietary guidelines adherence

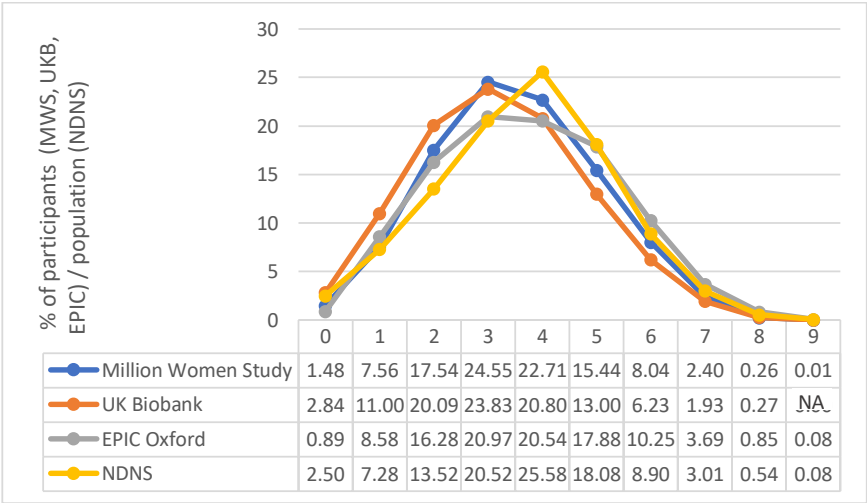

Supplement: inline-supplementary-material-1 [file inline-supplementary-material-1.pdf]
